# Supplementary material for: The patterns of elemental concentration (Ca, Na, Sr, Mg, Mn, Ba, Cu, Pb, V, Y, U and Cd) in shells of invertebrates representing different CaCO 3 polymorphs: a case study from the brackish Gulf of Gdańsk (the Baltic Sea)
Source: Copernicus journal article supplement (doi:10.5194/bg-18-707-2021), 2021-01-29
Supplement: Supplementary file 1 [file bg-18-707-2021-supplement.zip]

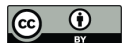

## *Supplement of*

# **The patterns of elemental concentration (Ca, Na, Sr, Mg, Mn, Ba, Cu, Pb, V, Y, U and Cd) in shells of invertebrates representing different $\text{CaCO}_3$ polymorphs: a case study from the brackish Gulf of Gdańsk (the Baltic Sea)**

**Anna Piwoni-Piórewicz et al.**

*Correspondence to:* Anna Piwoni-Piórewicz ([apiwoni@iopan.pl](mailto:apiwoni@iopan.pl))

- [bg-18-707-2021-supplement-title-page.pdf](#)
- [TableS1.xlsx](#)

The copyright of individual parts of the supplement might differ from the CC BY 4.0 License.
