# Supplementary material for: The patterns of elemental concentration (Ca, Na, Sr, Mg, Mn, Ba, Cu, Pb, V, Y, U and Cd) in shells of invertebrates representing different CaCO 3 polymorphs: a case study from the brackish Gulf of Gdańsk (the Baltic Sea)
Source: Copernicus journal article supplement (doi:10.5194/bg-18-707-2021), 2021-01-29
Supplement: Supplementary file 1 [file TableS1.xlsx]

## Sheet: Elemental concentrations
Table S1
Sample	Species	Size class	Ca, µg/g	Mg, µg/g	Na, µg/g	Sr, µg/g	V, µg/g	Mn, µg/g	Cu, µg/g	Y, µg/g	Cd, µg/g	Ba, µg/g	Pb, µg/g	U, µg/g
BI1	Amphibalanus improvisus	1	295254	3789.4	2762.94	2093.45	0.659865	696.125	6.34915	0.280521	0.0836602	67.2962	1.53224	0.144663
BI2	Amphibalanus improvisus	1	312912	3853.63	2748.13	2218.8	0.473365	638.768	2.48318	0.19644	0.0467726	63.4368	1.15891	0.0813571
BI3	Amphibalanus improvisus	1	312945	3779.06	2702.96	2218.58	0.391046	531.821	6.31802	0.146714	0.0656633	66.2085	1.08659	0.0937953
BI4	Amphibalanus improvisus	1	305333	4131.99	3061.14	2208.83	0.780112	602.96	3.88457	0.291067	0.0713327	63.0029	3.52399	0.141127
BI5	Amphibalanus improvisus	1	302132	3822.13	2641.37	2174.23	0.68675	669.748	2.89526	0.251472	0.0480849	67.6903	1.86422	0.134841
BI6	Amphibalanus improvisus	1	311989	4101.69	3275.21	2281.91	0.662569	756.835	4.65647	0.314987	0.0611618	68.123	1.59514	0.20764
BI7	Amphibalanus improvisus	1	287106	3792.32	2490.44	2051.87	0.619913	707.832	2.60881	0.256659	0.0531389	64.7138	1.60466	0.0949442
BI8	Amphibalanus improvisus	1	324295	4278.06	3071.43	2349.45	0.631394	530.603	8.19382	0.227525	0.0852375	67.9189	3.85689	0.131504
BI9	Amphibalanus improvisus	1	306732	3975.79	2619	2210.69	0.564562	610.592	6.79285	0.221385	0.0902693	68.8392	1.9985	0.123725
BI10	Amphibalanus improvisus	1	344197	4264.14	2929.47	2478.9	0.480612	619.375	6.10575	0.20287	0.0560252	73.3309	1.46968	0.0820644
BI11	Amphibalanus improvisus	2	294995	3730.86	2472.66	2019.97	0.58849	554.645	2.71734	0.233224	0.0642039	65.3603	1.9393	0.0988768
BI12	Amphibalanus improvisus	2	313073	3781.27	3075.55	2269.63	0.396579	530.02	2.54549	0.159288	0.0539562	69.6888	0.955359	0.118815
BI13	Amphibalanus improvisus	2	298354	3962.49	2675.97	2157.77	0.30836	697.819	2.6563	0.152369	0.0539709	66.7473	0.969481	0.0927696
BI14	Amphibalanus improvisus	2	315122	4394.9	2941.81	2188.19	0.530088	475.72	2.25059	0.186259	0.072789	64.9851	1.09031	0.112088
BI15	Amphibalanus improvisus	2	300876	3644.43	2537.22	2175.41	0.611652	673.805	3.29792	0.295586	0.0597629	67.4718	1.30838	0.154327
BI16	Amphibalanus improvisus	2	313985	3733.36	2735.24	2335.74	0.3497	566.053	1.78766	0.129549	0.0373083	68.3308	0.746264	0.0775151
BI17	Amphibalanus improvisus	2	390177	4558.34	3605.64	2828.17	0.246628	482.788	7.12651	0.142434	0.0287375	61.7486	0.704955	0.0624
BI20	Amphibalanus improvisus	2	329155	4550.86	2803.81	2254.78	0.440907	605.427	5.95689	0.156126	0.0530219	68.8277	0.892286	0.0797313
BI21	Amphibalanus improvisus	3	294435	4009	2727.43	2112.06	0.520385	525.429	1.77419	0.200453	0.0517905	65.0422	1.0699	0.0778764
BI23	Amphibalanus improvisus	3	293675	3586.06	2759.85	2070.65	0.469863	657.082	2.24147	0.205335	0.0633455	68.8154	1.01462	0.105965
BI24	Amphibalanus improvisus	3	369006	4042.07	5074.84	2256.72	0.294213	612.999	3.43558	0.106096	0.0468593	64.4146	0.723821	0.117118
BI25	Amphibalanus improvisus	3	374097	3772.71	2950	2088.5	0.567468	575.501	2.47356	0.197855	0.077025	65.9627	1.37445	0.193833
BI26	Amphibalanus improvisus	3	336095	4246.18	3102.93	2541.89	0.252128	622.658	2.2665	0.113337	0.0498284	65.4405	0.684561	0.0603454
BI27	Amphibalanus improvisus	3	276413	3916.49	2454.73	1997.03	<0.02	969.791	4.46999	0.780528	0.089654	93.3793	3.28746	0.134926
BI28	Amphibalanus improvisus	3	333964	4717.9	3318.93	2708.49	0.457915	414.161	1.90569	0.162826	0.0486132	66.6121	1.39722	0.0581373
BI29	Amphibalanus improvisus	3	329042	4479.53	2798.28	2485.36	0.45272	464.572	2.10115	0.166679	0.0857925	67.6671	1.09854	0.150511
BI30	Amphibalanus improvisus	3	318912	4073.75	2786.19	2193.4	0.251881	535.085	2.23649	0.113329	0.0500091	66.906	0.589473	0.0688921
BI31	Amphibalanus improvisus	4	338705	3660.15	2661.92	2288.83	0.385065	1021.9	8.31442	0.178531	0.0847617	119.186	1.01108	0.0679079
BI32	Amphibalanus improvisus	4	302565	3759.7	2633.39	2143.72	0.470136	628.939	5.74455	0.187716	0.0790034	68.9196	1.06358	0.134434
BI33	Amphibalanus improvisus	4	357049	4072.73	2984.35	2421.71	0.296724	432.762	1.21919	0.113995	0.0534435	65.0441	0.686257	0.0835402
BI34	Amphibalanus improvisus	4	314403	3782.2	2682.46	2307.18	0.761881	1161.4	7.1021	0.340744	0.124899	145.031	2.11483	0.220235
BI35	Amphibalanus improvisus	4	329107	3641.47	2801.13	2350.01	0.155214	434.288	2.05832	0.0708601	0.0311973	67.7497	0.456025	0.0346694
BI36	Amphibalanus improvisus	4	299679	3697.11	2608.74	2242.67	0.481181	753.237	7.67311	0.216176	0.0818444	133.491	1.3975	0.102296
BI37	Amphibalanus improvisus	4	300592	3505.16	2514.4	2052.68	0.414244	454.546	5.40252	0.174606	0.0365811	59.1574	0.764228	0.128379
BI38	Amphibalanus improvisus	4	324364	3693.57	2735.63	2360.29	0.4769	769.752	2.35668	0.209142	0.0633284	110.866	1.00471	0.123879
BI39	Amphibalanus improvisus	4	279631	3627.43	2214.72	1983.63	0.45131	617.657	1.84582	0.186845	0.0367733	59.0339	0.818318	0.0480467
BI40	Amphibalanus improvisus	4	276112	3369.14	2358.48	2022.94	0.199421	534.19	1.75841	0.100927	0.0364972	67.1919	0.552829	0.0471952
1	Cerastoderma glaucum	1	332202	55.9793	3339.14	1737.98	0.082838	14.6008	5.10968	0.0479783	0.0121586	18.1257	<0.5	0.0656976
2	Cerastoderma glaucum	1	353642	74.6946	3269.11	1781.8	0.139684	28.8574	30.5996	0.401047	0.0430017	35.4305	<1.2	0.14272
3	Cerastoderma glaucum	1	356785	47.5437	3570.15	1707.66	<0.09	22.198	7.17157	0.0288854	<0.009	17.7788	<0.6	0.069066
4	Cerastoderma glaucum	1	350560	55.6707	3461.81	1802.09	<0.16	40.1084	11.7924	0.0552325	0.0165805	24.4593	<0.9	0.0804843
5	Cerastoderma glaucum	1	355943	77.6704	3520.29	1662.35	<0.33	48.7657	26.846	0.0976805	<0.035	32.9408	<2	0.0971563
CG1	Cerastoderma glaucum	1	332127	71.6926	3095.95	1433.27	0.0718773	10.3097	2.05363	0.0994778	0.022208	17.1702	0.198351	0.146257
CG2	Cerastoderma glaucum	1	343958	75.9079	3166.78	1475.76	0.0606832	9.89076	2.0968	0.0913447	0.0156314	15.6437	0.26413	0.15437
CG3	Cerastoderma glaucum	1	338297	75.1771	3481.6	1533.01	0.0803212	18.2667	2.39617	0.164718	0.0283271	20.9691	0.231327	0.0880892
CG4	Cerastoderma glaucum	1	350465	89.5771	3244.39	1571.83	0.0773615	10.8454	2.50885	0.0813025	0.0187641	15.9731	0.273816	0.154867
CG5	Cerastoderma glaucum	1	322795	94.8799	3297.08	1633.97	0.115399	19.2745	3.41394	0.149603	0.015522	20.7031	0.297505	0.129731
6	Cerastoderma glaucum	2	303867	76.9651	2915.71	1495.77	0.0309251	5.29691	10.5937	0.0223488	0.00630378	8.06882	0.122089	0.0251794
7	Cerastoderma glaucum	2	380853	93.6076	3611.16	1911.49	0.0231469	8.59236	7.38458	0.0187264	0.00493221	9.4316	0.0944552	0.0304995
8	Cerastoderma glaucum	2	365402	68.8971	3456.92	1852.26	0.0145429	5.14699	2.79541	0.013028	0.00198833	6.18052	0.0608028	0.0156731
9	Cerastoderma glaucum	2	349891	63.0753	3556.16	1772.02	0.0186774	10.0192	2.09001	0.00933993	0.00207524	9.01847	<0.1	0.0225005
10	Cerastoderma glaucum	2	367549	101.543	3599.33	1738.06	0.0307051	5.72338	4.30057	0.0147854	0.0176989	8.51563	0.115899	0.0226429
CG6	Cerastoderma glaucum	2	342085	91.4371	2975.15	1716.17	0.0714793	15.2748	2.8469	0.110697	0.0114174	16.7568	0.192965	0.146585
CG7	Cerastoderma glaucum	2	345766	97.438	3120.8	1714.91	0.0614447	14.1322	1.90573	0.0757181	0.00694588	18.0895	0.181935	0.156824
CG8	Cerastoderma glaucum	2	344878	94.3898	3373.52	1702.89	0.0884695	8.00673	1.93152	0.0263254	<0.0004	16.0209	0.114372	0.042646
CG9	Cerastoderma glaucum	2	341211	97.8492	3101.6	1506.88	0.0655484	10.1547	2.74115	0.0762443	0.01131	16.4991	0.176701	0.160794
CG10	Cerastoderma glaucum	2	362131	109.073	3408.64	1567.87	0.0725675	9.51723	2.84027	0.0725205	0.0149756	16.5454	0.164216	0.16968
11	Cerastoderma glaucum	3	331118	68.0776	2988.02	1560.67	0.00417915	1.65941	1.31715	0.0123672	0.00329685	2.41128	0.0138014	0.0081182
12	Cerastoderma glaucum	3	358765	66.6921	3252.74	1512.49	0.00869046	1.83353	0.582704	0.0408194	0.00179414	2.67779	0.0219235	0.0125122
13	Cerastoderma glaucum	3	362134	65.4007	3300.82	1768.1	0.00312357	1.00629	0.980617	0.00567383	0.000959227	2.21047	0.012969	0.00461384
14	Cerastoderma glaucum	3	357406	49.2727	3334.9	1618.33	0.00399683	2.03886	0.339042	0.017874	0.00246961	2.31508	0.0132697	0.00673981
15	Cerastoderma glaucum	3	364696	57.5034	3297.14	1747.68	0.0107479	2.44568	0.995623	0.0252357	0.00339754	3.27858	0.0156489	0.0111892
CG11	Cerastoderma glaucum	3	346488	87.4215	3051.22	1565.06	0.238763	23.2332	4.96727	0.103143	0.0191722	30.8818	0.27853	0.218327
CG12	Cerastoderma glaucum	3	353246	88.4007	3043.13	1612.64	0.210633	13.4417	4.16372	0.0606509	0.0154504	17.1851	0.169373	0.11824
CG13	Cerastoderma glaucum	3	337837	87.5459	3111.25	1564.6	0.140517	11.8443	2.11183	0.0574389	0.00899122	17.1669	0.20339	0.10376
CG14	Cerastoderma glaucum	3	363818	230.195	3160.37	1575.13	0.10628	11.752	2.28575	0.0405093	0.00839252	16.6078	0.154434	0.105639
CG15	Cerastoderma glaucum	3	328013	105.727	3058.36	1654.25	0.124998	8.62335	2.16801	0.0428145	0.0148216	16.9048	0.173666	0.103936
16	Cerastoderma glaucum	4	366935	84.9265	3233.1	1968.52	0.00313199	0.634654	0.233508	0.00704917	0.000681357	1.21492	0.00622923	0.00319866
17	Cerastoderma glaucum	4	357077	88.5051	3204.58	1955.62	0.0029489	0.965557	0.658682	0.01108	0.00138449	1.82772	0.0137851	0.00423342
18	Cerastoderma glaucum	4	353574	62.254	3297.98	1842.52	0.00286299	1.18515	0.187944	0.0100411	0.000663181	1.49258	0.0122803	0.00368135
19	Cerastoderma glaucum	4	357249	74.5475	3330.34	1914.48	0.00286576	0.992552	0.245845	0.0137716	0.00117196	1.44845	0.0096614	0.00466092
20	Cerastoderma glaucum	4	311996	46.6174	2767.52	1682	0.00559452	0.614426	0.615986	0.0119052	0.0017026	1.73329	0.0103536	0.00575363
CG16	Cerastoderma glaucum	4	342446	80.3547	2945.98	1729.4	0.101125	18.7977	2.04652	0.18706	0.0280645	28.1375	0.274382	0.247453
CG17	Cerastoderma glaucum	4	346717	128.275	3025.13	1756.45	0.104173	10.9273	1.56487	0.0965245	0.00972141	28.5665	0.207159	0.221066
CG18	Cerastoderma glaucum	4	361073	74.5904	3049.92	1986.31	0.105422	11.3193	1.36981	0.1089	0.0132514	32.1692	0.212632	0.238812
CG19	Cerastoderma glaucum	4	334450	68.7121	2955.38	1784.24	0.151313	17.5893	1.67218	0.145615	0.0171207	25.412	0.264463	0.141251
CG20	Cerastoderma glaucum	4	332468	79.6235	2910.48	1811.64	0.128245	21.4456	1.35583	0.159574	0.0146914	26.8802	0.250829	0.338806
21	Limecola balthica	1	357676	112.817	3331.01	1639.98	0.0386201	10.4215	3.6808	0.110382	0.016299	11.6919	<0.2	0.063308
22	Limecola balthica	1	369085	109.633	3324.45	1757.9	0.0134507	4.39855	0.933118	0.0276701	0.00602939	5.44466	0.0722324	0.0505114
23	Limecola balthica	1	346401	99.1667	2963.49	1650.06	0.0258655	3.04025	0.616422	0.0178533	0.003857	4.59953	0.0345414	0.0243845
24	Limecola balthica	1	364171	85.3552	3154.08	1761.72	0.0241226	2.54268	0.63254	0.00868686	0.00210258	3.79705	0.0348673	0.0230115
25	Limecola balthica	1	345770	97.3975	2996.64	1605.89	0.0184302	4.40383	1.06225	0.034315	0.00512549	5.61217	0.0471564	0.0384501
MB1	Limecola balthica	1	351966	62.7926	3536.04	1556.16	0.0595332	17.1701	8.89253	0.0400061	0.00769638	17.8732	0.116566	0.0452642
MB2	Limecola balthica	1	350947	55.2672	3673.68	1673.43	0.101893	21.4198	7.88336	0.0613561	0.0126461	17.997	0.336679	0.0643537
MB3	Limecola balthica	1	360318	181.201	3534.23	1608.36	0.0653978	16.5188	11.4843	0.0693088	0.0206285	20.1149	0.361106	0.0877427
MB4	Limecola balthica	1	346312	74.8879	3269.66	1539.21	0.0830619	12.0814	8.91642	0.0522263	<0.001	18.3742	0.430214	0.0337738
MB5	Limecola balthica	1	359753	51.3322	3618.38	1656	0.0606189	28.4998	5.37845	0.0314417	0.00610477	18.0478	0.18129	0.0425829
26	Limecola balthica	2	361060	98.4933	3242.76	1744.13	0.0146786	1.83957	0.595885	0.0131674	0.00213875	3.23417	0.0256175	0.0228359
27	Limecola balthica	2	358326	76.3582	3080.28	1669.86	0.00367257	0.795814	0.198777	0.017868	0.00130029	2.01138	0.0234971	0.0190632
28	Limecola balthica	2	333317	108.54	3022.13	1581.89	0.0170463	2.16827	0.401643	0.00865023	0.00217912	2.10781	0.0245201	0.00687963
29	Limecola balthica	2	334419	72.9615	3002.28	1525.91	0.0150059	2.95452	0.617723	0.0160687	0.00190206	2.79844	0.0334852	0.0124563
30	Limecola balthica	2	352605	95.9957	3046.57	1693.6	0.00528678	1.60501	0.284657	0.00861651	0.00134586	2.15476	0.0182779	0.0215779
MB6	Limecola balthica	2	334775	101.838	2761.11	2435.51	<0.002	14.2302	2.07141	0.197276	0.00686534	27.6234	0.478001	0.0198541
MB7	Limecola balthica	2	353701	73.0572	2924.65	2397.41	<0.004	11.794	6.14531	0.30651	0.00944627	27.4441	0.573733	0.0314374
MB8	Limecola balthica	2	343723	49.8069	3199.95	1897.7	0.0788314	9.7004	8.38673	0.26209	0.0255637	25.1942	0.584956	0.0543034
MB9	Limecola balthica	2	363594	45.934	3558.39	2022.29	<0.005	17.1693	3.80597	0.0531054	0.0118012	21.9	0.0940374	0.0524819
MB10	Limecola balthica	2	311213	49.1827	3188.55	1914.34	0.0831073	13.7611	9.17722	0.0782175	<0.015	25.982	0.267605	0.059362
31	Limecola balthica	3	351709	86.156	3025.08	1603.53	0.00901447	0.96527	0.196313	0.00424636	0.000647501	1.38437	0.0138834	0.00834999
32	Limecola balthica	3	328200	76.7732	2851.16	1559.32	0.00670767	0.876125	0.211648	0.00851625	0.0010526	1.68897	0.0163848	0.0160553
33	Limecola balthica	3	290410	74.5478	2497.28	1346.05	0.00456219	0.622611	0.101524	0.00578653	0.00106536	1.2352	0.0114211	0.0132702
34	Limecola balthica	3	319728	61.8239	2539.77	1697.35	0.00280882	0.443036	0.0540261	0.0046303	0.000625852	1.01466	0.00925972	0.00523713
35	Limecola balthica	3	353496	69.6935	2750.81	1843.71	0.00210484	0.416217	0.0466621	0.00386443	0.000438662	0.91072	0.00813656	0.00590199
MB11	Limecola balthica	3	374510	45.4427	3333.21	1916.2	0.0726788	6.6506	3.01675	0.089523	0.0307154	23.6232	0.136119	0.0595722
MB12	Limecola balthica	3	344306	45.0922	2924.12	1748.28	0.0363178	5.96068	3.28159	0.122395	0.0155961	21.7459	0.155324	0.0403148
MB13	Limecola balthica	3	358461	47.7948	3327.94	1982.6	0.067946	14.2661	1.26356	0.293668	0.0112969	26.2203	0.145596	0.0720302
MB14	Limecola balthica	3	311602	47.2183	2876.02	1830.2	0.033426	9.37009	7.72014	0.0559568	0.0176256	22.5546	0.13931	0.0318667
MB15	Limecola balthica	3	348440	43.3305	3272.53	1801.45	0.0321981	16.4104	5.39721	0.130465	0.00431843	21.0041	0.134815	0.0245821
36	Limecola balthica	4	322017	73.5707	2542.24	1752.64	0.00459172	0.59219	0.0622669	0.00528988	0.000756776	1.10131	0.00869798	0.00601185
37	Limecola balthica	4	350776	87.5402	2894.5	1853.3	0.00370374	0.755366	0.0710211	0.0054378	0.000614064	1.17506	0.00837921	0.00591322
38	Limecola balthica	4	337678	74.8405	2653.16	1824.63	0.00630643	0.93849	0.0992217	0.00735754	0.000891134	1.4418	0.0151619	0.00866292
39	Limecola balthica	4	349929	99.1665	2773.32	1826.54	0.00415776	0.39694	0.107367	0.00534694	0.00101938	0.991714	0.0109653	0.00482793
40	Limecola balthica	4	345215	88.2262	2789.68	1591.88	0.0014844	0.263477	0.0494685	0.00162371	0.000676736	0.637587	0.00659768	0.00347119
MB16	Limecola balthica	4	334490	88.4865	3041.84	1936.23	0.0882426	16.7592	2.44853	0.365686	0.0062605	25.4769	0.155217	0.0782639
MB17	Limecola balthica	4	358906	32.9984	3511.42	1772.21	0.0606031	9.7984	1.13516	0.420775	<0.001	21.6588	0.122302	0.0786599
MB18	Limecola balthica	4	329261	37.8219	3153.93	1662.06	0.0681298	10.3644	5.569	0.130572	0.0184232	23.5094	0.179541	0.0679903
MB19	Limecola balthica	4	341528	57.8017	3022.9	1933.26	<0.003	9.89678	7.46406	0.159088	0.0115434	22.5593	0.203199	0.0299097
MB20	Limecola balthica	4	330409	62.5858	3003.1	1851.99	<0.001	12.1738	2.35462	0.122465	0.00659245	22.7625	0.123411	0.0326801
41	Mya arenaria	1	342104	160.335	3137.6	1730.3	0.0367191	5.31804	0.0615661	0.0888012	0.00306172	3.23674	0.0206954	0.0102482
42	Mya arenaria	1	341056	127.822	3094.33	1910.19	0.0121763	1.57375	0.0302545	0.0292438	0.00129073	2.66374	0.0161868	0.00481304
43	Mya arenaria	1	362546	185.021	3267.3	1950.03	0.00419025	0.580953	0.0125116	0.00928179	0.000309989	1.2363	0.00434408	0.00201015
44	Mya arenaria	1	362639	145.206	3271.87	1943.14	0.00259249	0.484528	0.0202146	0.00938853	0.00157479	1.201	0.00779251	0.00333349
45	Mya arenaria	1	350293	120.926	3080.87	2104.31	0.00996718	1.38982	0.0182023	0.0179799	0.000851157	1.85345	0.00786215	0.00459128
MA1	Mya arenaria	1	376543	166.86	2851.97	2432.45	0.0205859	1.74727	0.0436125	0.0180164	0.00334166	4.13173	0.0176543	0.00475549
MA2	Mya arenaria	1	348851	158.445	2776.01	2047	0.0126091	1.39775	0.0204487	0.0115181	0.000624557	2.90264	0.00921121	0.00298232
MA3	Mya arenaria	1	386374	181.834	2985.16	2530.11	0.0151714	1.85357	0.0316859	0.0164491	0.0010435	5.06509	0.0124159	0.00421048
MA4	Mya arenaria	1	373269	144.026	2875.79	2713.39	0.0111904	1.09154	0.0282823	0.0118668	0.00117749	3.64313	0.0100391	0.00220256
MA5	Mya arenaria	1	382537	161.814	2919.93	2951.75	0.0164102	1.49689	0.0337386	0.0149305	0.000623907	4.47269	0.0113881	0.00295957
46	Mya arenaria	2	364070	129.747	2936.28	2146.61	0.00240984	0.514938	0.00839162	0.00374032	0.000903374	1.22057	0.00232933	0.000887684
47	Mya arenaria	2	349987	167.378	3073.02	2163.89	0.0155253	0.932186	0.0219678	0.021754	0.00289659	2.16317	0.0160865	0.00872985
48	Mya arenaria	2	360225	178.951	2924.02	2161.32	0.00645314	0.839208	0.0159173	0.0106847	0.00129999	1.62967	0.0110516	0.00280634
49	Mya arenaria	2	359044	120.416	3150.83	1988.78	0.0142338	1.3195	0.0484154	0.0250521	0.00394473	2.26235	0.0228494	0.00665416
50	Mya arenaria	2	355725	128.482	2985.77	2219.4	0.0057351	0.409099	0.0110639	0.00842576	0.00110595	1.30665	0.0153789	0.00209152
MA6	Mya arenaria	2	375988	115.929	3173.41	2398.6	0.0162568	2.09147	0.0633046	0.0184183	0.00558177	3.68865	0.0267638	0.00845275
MA7	Mya arenaria	2	390821	137.599	3216.53	2595.64	0.0320738	3.18269	0.113532	0.0340092	0.00759875	6.26376	0.0465657	0.0151867
MA8	Mya arenaria	2	377256	137.92	3354.85	2259.77	0.0392274	2.78078	0.0709472	0.0555054	<0.001	6.06067	0.0290949	0.0134373
MA9	Mya arenaria	2	372374	132.787	3292.74	2166.11	0.0331178	2.19609	0.0561407	0.0444975	0.00111849	5.09783	0.0205117	0.0135354
MA10	Mya arenaria	2	369183	153.799	3255.46	2183.48	0.0439967	2.50558	0.0603334	0.0511134	<0.001	5.21152	0.0268857	0.0137981
51	Mya arenaria	3	371336	137.99	2929.15	2209.03	0.00239939	0.275974	0.00633116	0.0074712	0.000675189	0.795933	0.00514003	0.00271123
52	Mya arenaria	3	339859	110.76	2942.34	2147.99	0.00297597	0.531625	0.0140723	0.00708719	0.00173691	0.939911	0.00800357	0.00247178
53	Mya arenaria	3	337691	146.209	3056.53	2075.77	0.00469252	0.486064	0.00987724	0.00800063	0.000837545	1.03193	0.00679215	0.00274145
54	Mya arenaria	3	369226	187.86	3028.02	1811.03	0.00544967	0.736424	0.0116732	0.0186462	0.00101557	0.573945	0.0062047	0.00294202
55	Mya arenaria	3	365099	127.444	3023.23	2483.89	0.0047346	0.383783	0.0107008	0.0070079	0.00056519	1.27744	0.00453407	0.0017795
MA11	Mya arenaria	3	373158	170.868	3288.74	2048.14	0.0264134	1.73119	0.045754	0.0236954	0.0014966	2.13071	0.0160909	0.00820097
MA12	Mya arenaria	3	374526	184.537	3240.22	2240.58	0.0304326	1.96875	0.0443358	0.0247094	0.00143705	2.76776	0.0180822	0.00879872
MA13	Mya arenaria	3	384236	135.329	3452.2	1916.1	0.0178193	1.4515	0.0313967	0.0266389	0.000588528	1.95013	0.0180299	0.00963001
MA14	Mya arenaria	3	385051	124.339	3394.4	1873.68	0.0217134	1.95411	0.0302269	0.0311562	0.00103125	2.59906	0.0236424	0.0109775
MA15	Mya arenaria	3	378796	147.758	3331.18	1938.34	0.0248441	2.26059	0.0434168	0.0373508	<0.001	3.27486	0.024846	0.0132075
56	Mya arenaria	4	322867	154.448	2697.29	2006.06	0.00207521	0.703751	0.00674451	0.00313523	0.000168079	2.58259	0.00266443	0.00100692
57	Mya arenaria	4	354828	141.573	2817.97	2011.95	0.00171992	0.516903	0.00654083	0.0057046	0.000210318	1.21248	0.00216693	0.00156181
58	Mya arenaria	4	354176	146.769	2910.6	1904.95	0.00238658	0.326891	0.00760079	0.0057568	0.000482474	0.697074	0.00304141	0.00123109
59	Mya arenaria	4	345840	151.44	2860.77	1929.51	0.00114285	0.348711	0.00552956	0.00356913	0.000454779	0.846555	0.00311723	0.000995034
60	Mya arenaria	4	305298	118.765	2596.46	1677.3	0.00285669	0.379654	0.00852117	0.00559089	0.000946196	0.582299	0.0050901	0.00155246
MA16	Mya arenaria	4	381702	141.904	3449.55	1957.89	0.0618733	2.82383	0.0726644	0.0436674	0.0154712	3.77646	0.0771683	0.0217971
MA17	Mya arenaria	4	371702	126.908	3315.09	2101.22	0.0351355	1.29594	0.0410828	0.0220681	0.00952289	1.97391	0.0359466	0.0112456
MA18	Mya arenaria	4	372934	184.389	3026.7	2384.79	0.00651635	1.20586	0.0170296	0.00797074	0.000733411	2.89588	0.00479168	0.00280485
MA19	Mya arenaria	4	373704	193.48	3085.31	2332.46	0.00895501	1.88878	0.0184873	0.0111382	0.000999756	3.59237	0.0071718	0.0031144
MA20	Mya arenaria	4	374062	210.969	3097.27	2710.42	0.00938967	1.79796	0.0178576	0.0104572	0.000632308	4.54928	0.0105511	0.00307251
21	Mytilus trossulus	1	317532	1073	1972	1108	1.8896	38.9089	34.764	0.0962	0.1601	na	3.8778	0.1112
23	Mytilus trossulus	1	331620	1160	2911	1199	2.3042	na	58.3428	0.1503	0.1652	na	6.2625	0.1153
ME2	Mytilus trossulus	1	332114	1051	na	1077	0.5258	52.4343	12.9813	0.3648	0.0394	12.6867	0.2674	0.0342
22	Mytilus trossulus	1	338277	1211	2116	1042	1.396	31.8083	26.6455	0.0868	0.101	na	3.4157	0.0767
ME3	Mytilus trossulus	1	345349	1027	na	1091	0.7076	48.6427	15.7131	3.1227	0.0457	14.5629	0.4965	0.0415
ME4	Mytilus trossulus	1	354827	1019	na	1078	1.6189	38.6982	18.7797	1.1395	0.0985	14.7877	0.259	0.0729
ME5	Mytilus trossulus	1	364043	1345	na	1157	1.4458	59.7435	17.04	4.8547	0.0942	14.664	0.3359	0.0598
ME1	Mytilus trossulus	1	na	na	na	1265	1.3813	42.0322	17.8645	1.6515	0.0889	12.5372	0.3165	0.0543
ME6	Mytilus trossulus	2	336751	916	na	1006	0.9947	54.8267	8.8726	0.2796	0.0703	11.6196	0.2395	0.0452
ME8	Mytilus trossulus	2	338971	1002	na	1207	0.9222	51.9806	14.9555	0.729	0.0845	14.3783	0.3018	0.0471
ME7	Mytilus trossulus	2	339992	1067	na	1083	1.0879	50.7407	12.8134	0.209	0.0621	12.5699	0.2404	0.0416
ME9	Mytilus trossulus	2	346035	1228	na	1215	0.6031	92.6074	21.9715	0.2516	0.1567	24.8844	0.323	0.1207
ME10	Mytilus trossulus	2	350509	1251	na	1173	0.8089	na	11.6538	0.1558	0.1629	22.3515	0.6329	0.0943
30	Mytilus trossulus	2	353982	1398	1983	1202	1.9926	62.0333	25.6509	0.0663	0.6886	8.9687	3.0829	0.0693
60	Mytilus trossulus	2	354401	1168	2289	1268	0.5202	51.9172	24.4017	0.0733	0.1574	18.802	1.3101	0.1288
48	Mytilus trossulus	2	355377	1156	2204	1304	0.6941	58.6828	20.4426	0.0744	0.0529	10.6941	1.3547	0.0488
89	Mytilus trossulus	2	355555	1094	2065	1198	0.9415	48.6166	16.2078	0.077	0.1903	16.4861	1.0381	0.1196
91	Mytilus trossulus	2	358764	1018	2190	1222	0.8792	52.2122	21.2882	0.0881	0.1504	32.4152	1.0468	0.1158
106	Mytilus trossulus	2	381108	1004	2269	1165	0.6284	na	10.1772	0.0853	0.0831	14.754	na	0.0296
99	Mytilus trossulus	3	310017	1011	1667	1122	0.4294	37.2365	7.5459	0.0804	0.0282	10.2189	na	0.0285
ME14	Mytilus trossulus	3	311878	978	na	1181	0.6045	60.4201	11.9209	0.9033	0.0407	14.181	0.2357	0.0423
ME12	Mytilus trossulus	3	329487	937	na	1066	0.4392	na	7.4786	0.0895	0.0282	15.9728	0.2471	0.0292
ME13	Mytilus trossulus	3	342980	1027	na	1255	0.306	73.2469	5.4447	0.0935	0.0218	23.4871	0.2259	0.0203
110	Mytilus trossulus	3	344860	983	2006	1102	1.0691	63.5733	13.3696	0.0547	0.1029	10.3086	0.7469	0.0656
146	Mytilus trossulus	3	351945	1075	1675	1157	0.3684	65.2579	10.2351	0.0863	0.0392	13.8542	na	0.0236
ME11	Mytilus trossulus	3	353063	999	na	1169	0.8212	na	9.3888	0.0795	0.0891	19.0296	0.3121	0.0486
133	Mytilus trossulus	3	380795	1366	1864	1303	0.5323	77.7877	8.0661	0.1676	0.0824	25.7795	na	0.0328
92	Mytilus trossulus	3	384634	1280	1757	1137	na	na	na	na	na	19.3785	na	na
79	Mytilus trossulus	3	386555	1218	2103	1102	0.206	33.4456	6.2917	0.0401	0.0278	10.4896	na	0.0221
ME15	Mytilus trossulus	3	396968	1166	na	1237	1.0313	42.0713	11.1131	0.0492	0.0893	14.7153	0.1903	0.0546
127	Mytilus trossulus	4	251724	609	1470	1027	0.2903	48.0613	3.364	0.0862	0.0231	15.5988	na	0.0254
129	Mytilus trossulus	4	280958	666	1700	1140	0.2906	45.9727	4.909	0.1009	0.0316	16.5726	0.3336	0.0256
124	Mytilus trossulus	4	303789	1249	1972	1276	0.386	49.339	12.1038	0.8865	0.1046	28.3273	1.5359	0.0508
ME17	Mytilus trossulus	4	333114	826	na	1202	0.2204	33.8288	4.8499	4.2181	0.0299	14.1163	0.1427	0.027
ME20	Mytilus trossulus	4	333932	1182	na	1259	0.2684	64.9031	6.092	0.723	0.0945	38.6705	0.3172	0.048
ME18	Mytilus trossulus	4	336293	810	na	1026	0.5484	69.7751	7.6108	0.1146	0.0583	16.943	0.2844	0.0288
122	Mytilus trossulus	4	339491	996	2271	1371	0.4108	39.2745	8.0174	0.1122	0.0301	16.8632	1.0726	0.0213
ME16	Mytilus trossulus	4	344288	923	na	1090	0.5037	72.4689	6.9762	2.6528	0.0375	12.3161	0.3427	0.0307
ME19	Mytilus trossulus	4	345363	855	na	1434	0.3663	88.1409	6.1653	0.1468	0.0373	27.9048	0.4231	0.0318
117	Mytilus trossulus	4	376791	1035	1965	1091	0.6007	54.3496	7.2598	2.7546	0.0315	9.5797	na	0.0327
144	Mytilus trossulus	4	381312	1052	1797	1253	0.3435	46.7788	10.9279	0.0671	0.034	13.6002	na	0.0183
	na = not analyzed
