# Supplementary material for: The patterns of elemental concentration (Ca, Na, Sr, Mg, Mn, Ba, Cu, Pb, V, Y, U and Cd) in shells of invertebrates representing different CaCO 3 polymorphs: a case study from the brackish Gulf of Gdańsk (the Baltic Sea)
Source: Copernicus journal article supplement (doi:10.5194/bg-18-707-2021), 2021-01-29
Supplement: Supplementary file 2 [file bg-18-707-2021-supplement.zip]

Archive with 2 entries (2 files):
- bg-18-707-2021-supplement-title-page.pdf
- TableS1.xlsx
